# Supplementary material
Source: PubMed Central journal article supplement (PMC2667975)
Supplement: mmc1.pdf [file mmc1.pdf]

## Supplemental Data

## Human Male Infertility Caused by Mutations in the CATSPER1 Channel Protein

Matthew R. Avenarius, Michael S. Hildebrand, Yuzhou Zhang, Nicole C. Meyer, Luke L.H. Smith,  
Kimia Kahrizi, Hossein Najmabadi, and Richard J.H. Smith

**Table S1. Oligonucleotides Used for Amplification of the Human *CATSPER1* Gene**

| Exon | Forward Primer (5'-3')                                                                 | Reverse Primer (5'-3')                                                                   |
|------|----------------------------------------------------------------------------------------|------------------------------------------------------------------------------------------|
| 1    | 1-1F: ATGAGCTTGGCTCAGGAAA<br>1-2F: TACCATGATGAGCTCCAACGTG<br>1-3F: CCTCATCACGGAGAGACCA | 1-1R: CCCCCTATGGTAATGGGAGT<br>1-2R: GTGGTACTCACTGGGGTGGT<br>1-3R: CTTACGATCTGCGGAAGGACAG |
| 2    | AGTGACCATGGACGCTGAG                                                                    | CTATAAACCGCCCGGCACT                                                                      |
| 3-4  | TGTGAGGCTAATGCTGAGGA                                                                   | CTTGAGCAGGTCACAGTGGA                                                                     |
| 5-6  | CCCAAGTCACCAACAAGTCA                                                                   | GGACATGCAGGCATCAGAAG                                                                     |
| 7    | GTATGGGAAGGGAGCAGGTC                                                                   | CCGGTACTTCTTGTGGGTTTCAGCGT                                                               |
| 8-9  | ACGCTGAACCCACAAGAAGTACCGG                                                              | TTAGGGGGATGGAGAGACTG                                                                     |
| 10   | CAGTCTCTCCATCCCCCTAA                                                                   | CTTCTAGAGGGGCAGGCAAT                                                                     |
| 11   | AAGAAGAGCCTCTGGGTGGT                                                                   | CCCATGGGAGTTACTTGGAG                                                                     |
| 12   | AGGGGCTTGTAGCCAGAAAT                                                                   | CGGACAATCATTCCAGCAG                                                                      |
